# Supplementary material for: Comparative psychometric analyses of the SCL-90-R and its short versions in patients with affective disorders
Source: PubMed Central journal article supplement (PMC3626675; doi:10.1186/1471-244x-13-104), 2013-03-28

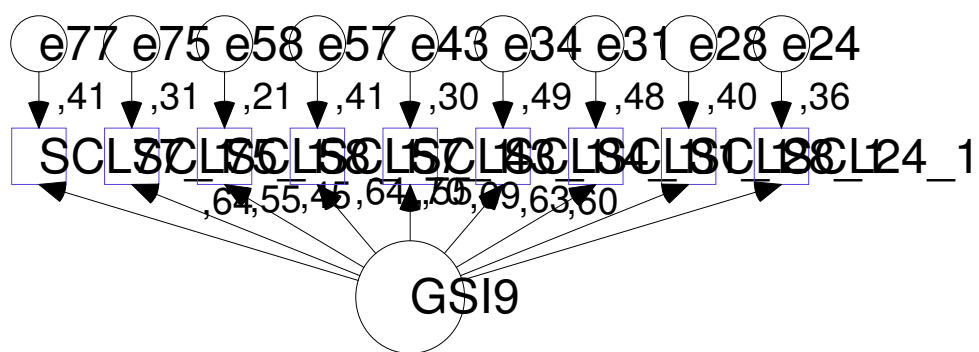

Supplement: 1471-244X-13-104-S6.pdf [file 1471-244X-13-104-S6.pdf]
